# Supplementary material
Source: publisher site journal article supplement (https://www.spandidos-publications.com/2842/downloadSupplementary)
Supplement: Supplementary file 1 [file downloadSupplementary]

## Sheet: Table SIV
Table SIV. Signaling pathways enriched by KEGG analysis of specific somatic mutated genes in 4 PNETs patients with liver metastasis.
ID	Description	GeneRatio	pvalue	p.adjust	qvalue	Gene	Count
hsa03440	Homologous recombination	2/10	0.00111647	0.0420794	0.0296514	RAD50/PALB2	2
hsa04062	Chemokine signaling pathway	3/10	0.00136508	0.0420794	0.0296514	JAK3/PRKCD/PIK3R3	3
hsa04930	Type II diabetes mellitus	2/10	0.00140453	0.0420794	0.0296514	PRKCD/PIK3R3	2
hsa05169	Epstein-Barr virus infection	3/10	0.00163053	0.0420794	0.0296514	JAK3/PIK3R3/ITGAL	3
hsa04810	Regulation of actin cytoskeleton	3/10	0.00192663	0.0420794	0.0296514	ITGAV/PIK3R3/ITGAL	3
hsa05166	Human T-cell leukemia virus 1 infection	3/10	0.00208658	0.0420794	0.0296514	JAK3/PIK3R3/ITGAL	3
hsa05223	Non-small cell lung cancer	2/10	0.00287236	0.0496508	0.0349867	JAK3/PIK3R3	2
